# Supplementary material
Source: PubMed Central journal article supplement (PMC7642142)
Supplement: NIHMS1624789-supplement-1.pdf [file NIHMS1624789-supplement-1.pdf]

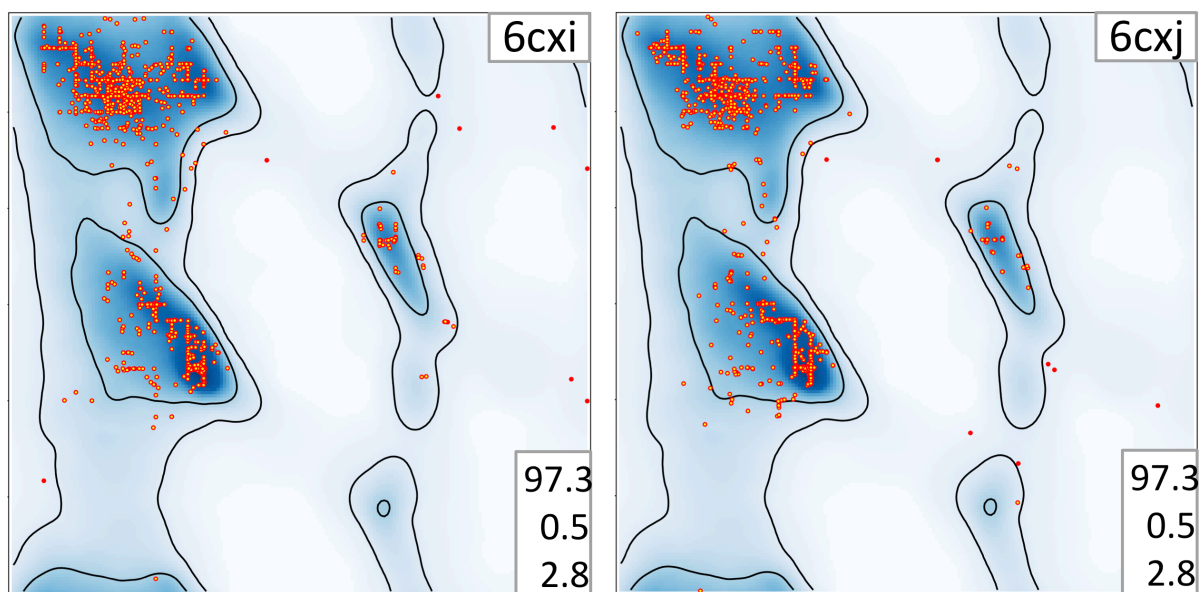

**Figure S1. Related to Results and discussion section 'High values of Rama-Z score from cryo-EM' and Figure 6.** Examples of grid-like distributions on Ramachandran plot with high Rama-Z score. Triplets of numbers on the bottom right on each plot indicate, from top to bottom: percentage of residues in favored and outlier regions, Rama-Z.

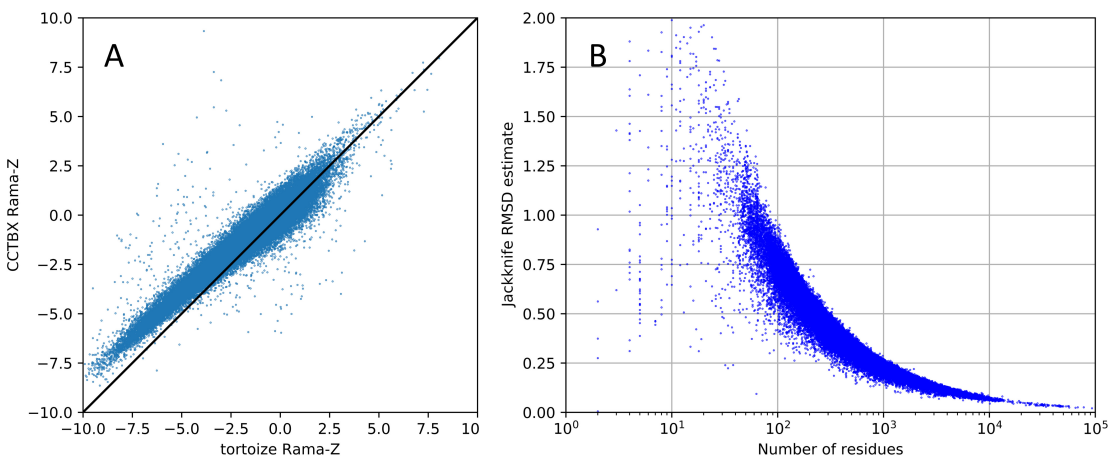

**Figure S2. Validating the Rama-Z implementations and RMSD estimation. Related to STAR methods section 'Rama-Z implementation' and 'Rama-Z reliability'.** Validating the Rama-Z implementations and RMSD estimation A. Rama-Z from CCTBX vs Rama-Z from *tortoise* for 124518 PDB-REDO entries; the diagonal is marked as a black line. B. Jackknife RMSD estimations (blue dots).

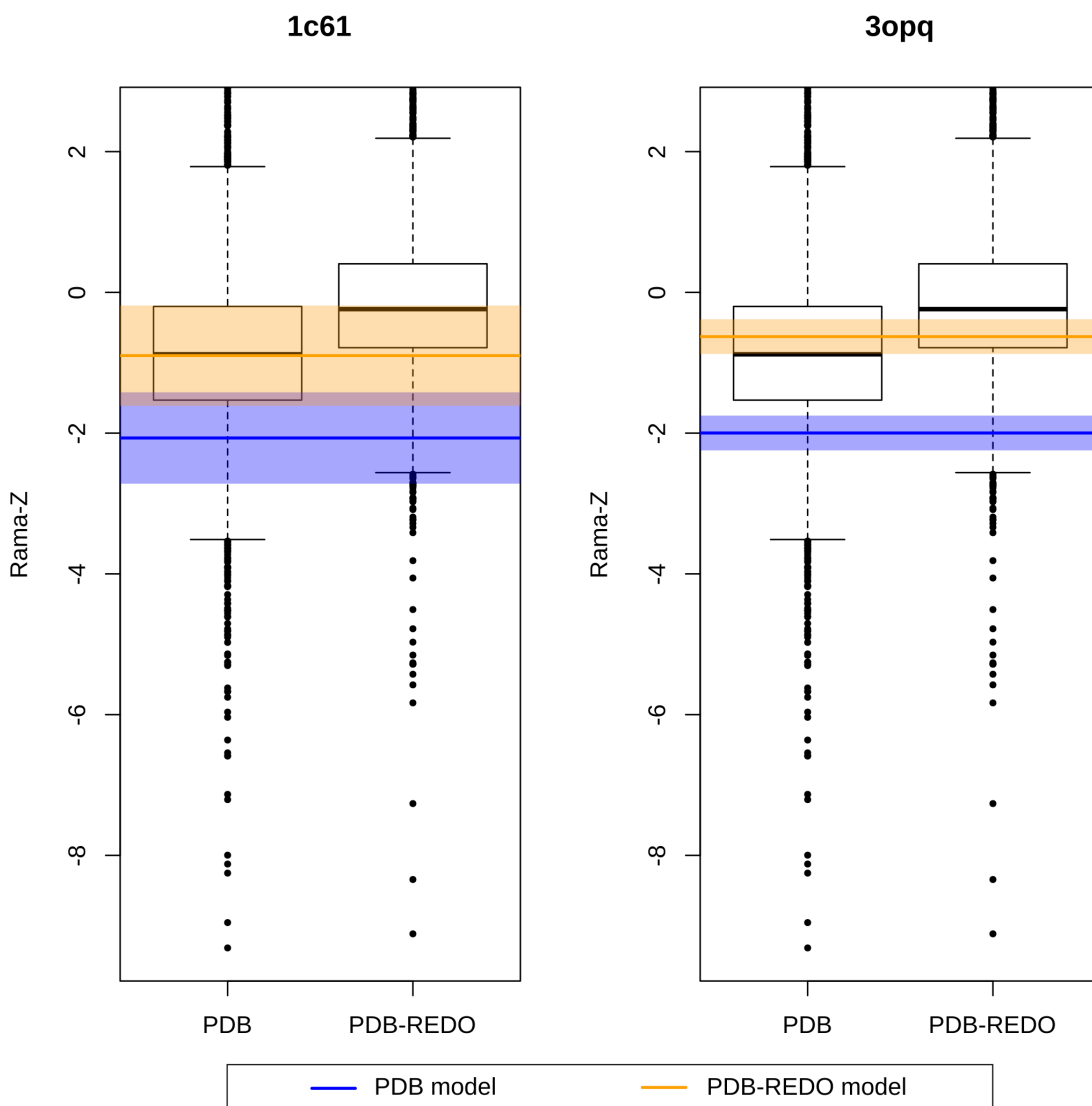

**Figure S3. Related to STAR methods section 'Rama-Z reliability'.** Two examples for the use of the RMSD value of Rama-Z in PDB-REDO: in 1c61 the improvement of the Rama-Z (blue line to orange line) appears significant, but it is not considering the large RMSD for this small structure (blue and orange background, indicating 1= RMSD); in 3opq a similar absolute value change in Rama-Z can be considered significant using the same criterion.

**Table S1. Related to STAR methods section 'Rama-Z implementation'. Residue counts.**

| Residue type | Helix | Sheet | Loop  |
|--------------|-------|-------|-------|
| ALA          | 70631 | 19896 | 42026 |
| LEU          | 67451 | 30469 | 43158 |
| GLU          | 49958 | 12828 | 35618 |
| LYS          | 36805 | 12588 | 32908 |
| VAL          | 35831 | 39369 | 39014 |
| ARG          | 35611 | 12931 | 28789 |
| ILE          | 33485 | 27816 | 29069 |
| SER          | 33288 | 15612 | 41675 |
| ASP          | 32091 | 11212 | 43895 |
| GLY          | 31498 | 16608 | 70883 |
| THR          | 27955 | 19858 | 35816 |
| GLN          | 27391 | 7765  | 20117 |
| PHE          | 22729 | 16370 | 24794 |
| ASN          | 22412 | 8715  | 32360 |
| TYR          | 19585 | 13879 | 22883 |
| MET          | 16014 | 6738  | 10847 |
| HIS          | 12777 | 6802  | 16117 |
| transPRO     | 12581 | 7615  | 47244 |
| prePRO       | 12093 | 8164  | 44056 |
| TRP          | 8341  | 5154  | 9754  |
| CYS          | 6606  | 5211  | 8371  |
| cisPRO       | -     | -     | 3953  |

**Table S2. Related to STAR methods section 'Key Resource Table'.**

| REAGENT or RESOURCE                                                                     | SOURCE                               | IDENTIFIER   |
|-----------------------------------------------------------------------------------------|--------------------------------------|--------------|
| Deposited Data                                                                          |                                      |              |
| The model was used to generate the Ramachandran plot on Figure 1 and Graphical abstract | Anderson <i>et al.</i> , 2002        | PDB ID: 1ix9 |
| The model was used to generate the Ramachandran plot on Figure 1                        | Kumar <i>et al.</i> , 2015           | PDB ID: 5a9z |
| The model was used to generate the Ramachandran plot on Figure 1                        | Coleman <i>et al.</i> , 2019         | PDB ID: 6dzv |
| The model was used to generate the Ramachandran plot on Figure 4                        | Twomey <i>et al.</i> , 2017          | PDB ID: 5vhw |
| The model was used to generate the Ramachandran plot on Figure 4                        | Gorzelnik <i>et al.</i> , 2016       | PDB ID: 5kip |
| The model was used to generate the Ramachandran plot on Figure 4                        | Myasnikov <i>et al.</i> , 2016       | PDB ID: 5Lks |
| The model was used to generate the Ramachandran plot on Figure 4 and Graphical abstract | Ding <i>et al.</i> , 2019            | PDB ID: 6j2q |
| The model was used to generate the Ramachandran plot on Figure 4                        | Li <i>et al.</i> , 2015              | PDB ID: 3ja8 |
| The model was used to generate the Ramachandran plot on Figure 4                        | Croll, 2018                          | PDB ID: 6eyc |
| The model was used to generate the Ramachandran plot on Figure 4                        | von der Ecken <i>et al.</i> , 2015   | PDB ID: 3j8a |
| The model was used to generate the Ramachandran plot on Figure 4                        | Sobti <i>et al.</i> , 2016           | PDB ID: 5t4q |
| The model was used to generate the Ramachandran plot on Figure 4                        | Urnavicius <i>et al.</i> , 2018      | PDB ID: 6f38 |
| The model was used to generate the Ramachandran plot on Figure 4                        | Estrozi <i>et al.</i> , 2011         | PDB ID: 2xkv |
| The model was used to generate the Ramachandran plot on Figure 4                        | Vassal-Stermann <i>et al.</i> , 2019 | PDB ID: 6qnt |
| The model was used to generate the Ramachandran plot on Figure 4                        | Zhao <i>et al.</i> , 2017            | PDB ID: 5voy |
| The model was used to generate the Ramachandran plot on Figure 5                        | Juers <i>et al.</i> , 2001           | PDB ID: 1jz7 |
| The model was used to generate the Ramachandran plot on Figure 5                        | Bartesaghi <i>et al.</i> , 2014      | PDB ID: 3j7h |
| The model was used to generate the Ramachandran plot on Figure 6                        | Ecken <i>et al.</i> , 2016           | PDB ID: 5jLh |
| The model was used to generate the Ramachandran plot on Figure 6 and Graphical abstract | Risi <i>et al.</i> , 2018            | PDB ID: 6g2t |
| The model was used to generate the Ramachandran plot on Figure 7                        | Leulliot <i>et al.</i> , 2004        | PDB ID: 1rje |
| The model was used to generate the Ramachandran plot on Figure 7                        | Huang <i>et al.</i> , 2004           | PDB ID: 1ycy |
| The model was used to generate the Ramachandran plot on Figure 7                        | Xu <i>et al.</i> , 2012              | PDB ID: 3vbb |
| The model was used to generate the Ramachandran plot on Figure 7                        | Schmidt <i>et al.</i> , 2012         | PDB ID: 4akg |
| The model was used to generate the Ramachandran plot on Figure 7                        | Khan <i>et al.</i> , 2015            | PDB ID: 4s0s |
| The model was used to generate the Ramachandran plot on Figure 7                        | Ma & Yun, 2018                       | PDB ID: 6adg |
| The model was used to generate the Ramachandran plot on Figure S1                       | Risi <i>et al.</i> , 2018            | PDB ID: 6cxi |
| The model was used to generate the Ramachandran plot on Figure S1                       | Risi <i>et al.</i> , 2018            | PDB ID: 6cxj |
